# Supplementary material for: Relationship of Post-Transplant Lymphoproliferative Disorders (PTLD) Subtypes and Clinical Outcome in Pediatric Heart Transplant Recipients: A Retrospective Single Institutional Analysis/Experience of 558 Patients
Source: MDPI journal article supplement (doi:10.3390/cancers15030976), 2023-02-03
Supplement: s1 [file s1]

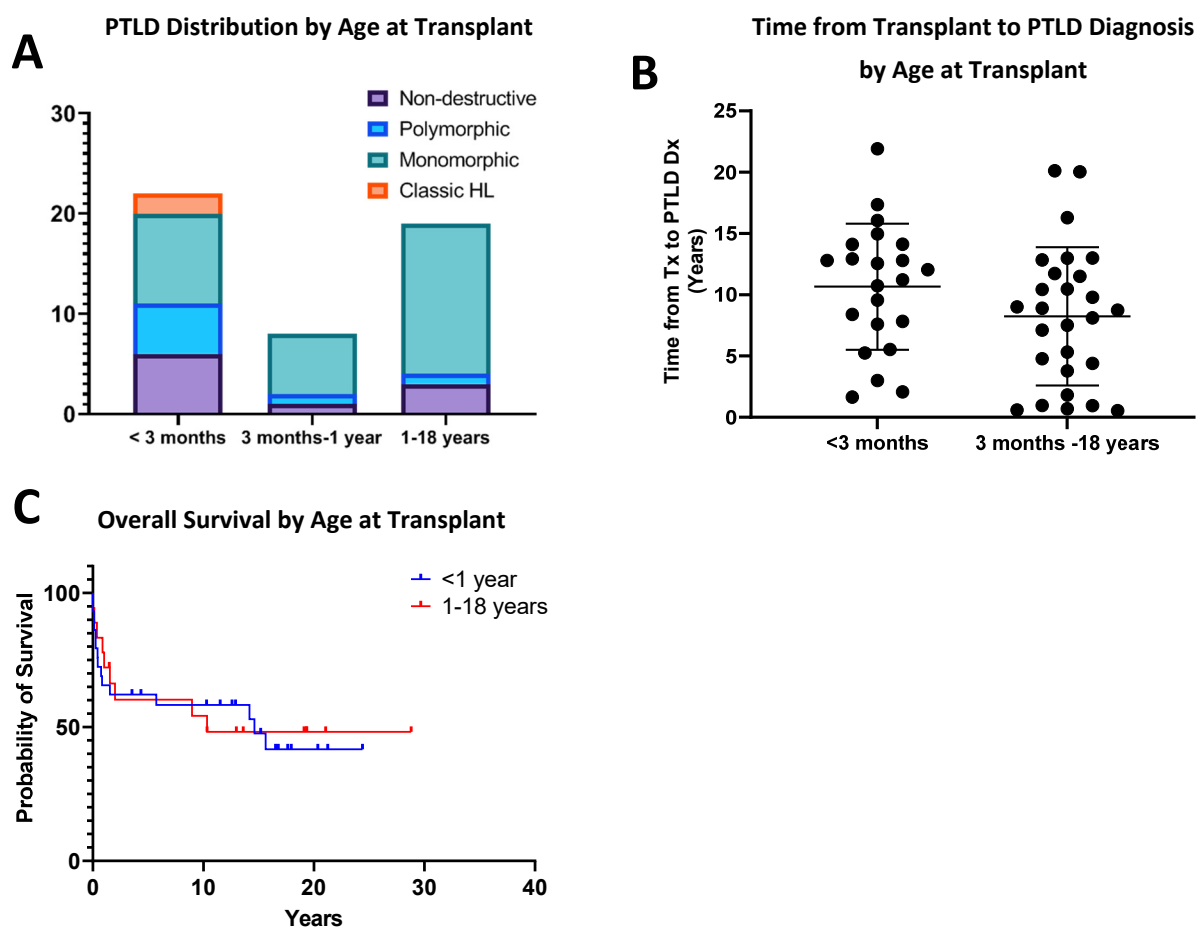

**Figure S1. Effect of age at transplant.** (A) PTLD distribution by age at transplant. (B) Time from transplant to PTLD diagnosis by age at transplant. (C) Overall survival by age at transplant.

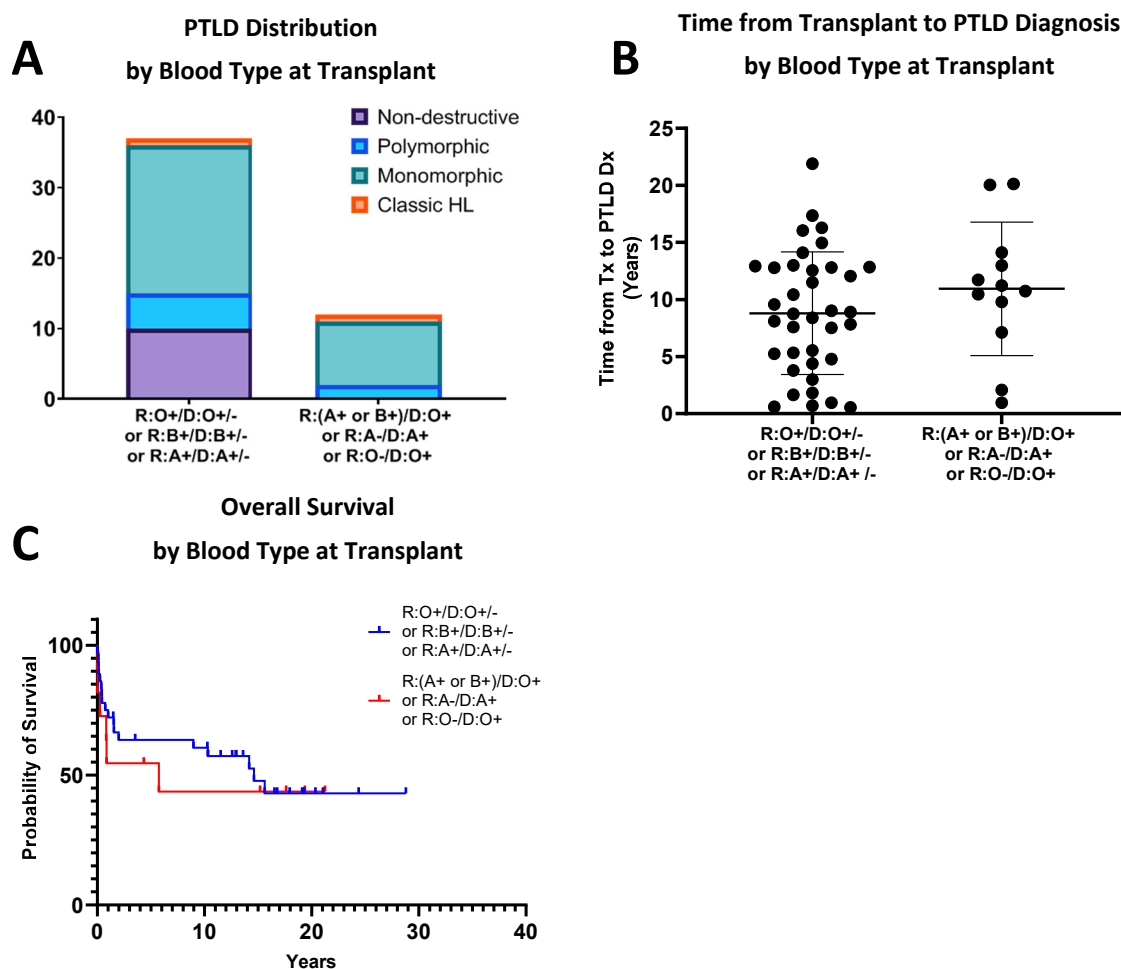

**Figure S2. Effect of recipient and donor blood type.** (A) PTLD distribution by blood type at transplant. (B) Time from transplant to PTLD diagnosis by blood type at transplant. (C) Overall survival by blood type at transplant.
